1                   **Integration of exogenous and endogenous co-stimulatory signals by CAR-Tregs**

2  
3                   Isaac Rosado-Sánchez<sup>1,2</sup>, Manjurul Haque<sup>1,3</sup>, Kevin Salim<sup>1,3</sup>, Madeleine Speck<sup>1,3</sup>, Vivian  
4                   Fung<sup>1,3</sup>, Dominic Boardman<sup>1,3</sup>, Majid Mojibian<sup>1,3</sup>, Giorgio Raimondi<sup>4</sup>, Megan K Levings<sup>1,2,3</sup>  
5  
6  
7

8                   <sup>1</sup> BC Children's Hospital Research Institute, Vancouver, BC, Canada V5Z 4H4

9                   <sup>2</sup> School of Biomedical Engineering, University of British Columbia, Vancouver, BC, Canada  
10                   V5Z 4H4

11                   <sup>3</sup> Department of Surgery, University of British Columbia, Vancouver, BC, Canada V5Z 4H4

12                   <sup>4</sup> Department of Plastic and Reconstructive Surgery, Johns Hopkins University School of  
13                   Medicine, Baltimore, MD 21205, USA  
14

15  
16  
17                   **Correspondence:** Megan K. Levings, [mlevings@bcchr.ca](mailto:mlevings@bcchr.ca)

18  
19                   **Conflict-of-interest statement:** MKL received research funding from Bristol Myers Squibb and  
20                   Takeda for work unrelated to this report. MKL is an inventor on pending patents related to HLA-  
21                   A2-specific CARs.  
22

1 **ABSTRACT**

2 Regulatory T cells (Tregs) expressing chimeric antigen receptors (CAR) are a promising tool to  
3 promote transplant tolerance. The relationship between CAR structure and Treg function was  
4 studied in xenogeneic, immunodeficient mice, revealing advantages of CD28-encoding CARs.  
5 However, these models could underrepresent interactions between CAR-Tregs, antigen-  
6 presenting cells (APCs) and donor-specific antibodies. We generated mouse Tregs expressing  
7 HLA-A2-specific CARs with different costimulatory domains and compared their function in  
8 vitro and in vivo. In vitro assays revealed the CD28-encoding CAR had superior antigen-specific  
9 suppression, proliferation and cytokine production. In contrast, in vivo protection from skin  
10 allograft rejection and alloantibody production was similar between Tregs expressing CARs  
11 encoding CD28, ICOS or PD1, but not GITR, 41BB or OX40, co-stimulatory domains. To  
12 reconcile in vitro and in vivo data, we analyzed effects of a CAR encoding CD3 $\zeta$  but no co-  
13 stimulatory domain. These data revealed that exogenous co-stimulation via APCs can  
14 compensate for the lack of a CAR-encoded CD28 domain. Thus, Tregs expressing a CAR with  
15 or without CD28 are functionally equivalent in vivo. This study reveals a new dimension of  
16 CAR-Treg biology and has important implications for the design of CARs for clinical use in  
17 Tregs.

18

## 1 INTRODUCTION

2 Adoptive cell therapy using regulatory T cells (Treg) has emerged as a promising therapeutic  
3 strategy to promote transplant tolerance and reduce dependence on immunosuppression (1-3).  
4 Multiple clinical studies have demonstrated that polyclonal Treg therapy is feasible, safe and  
5 possibly effective (4-7). However, data from pre-clinical models revealed that alloantigen-  
6 specific Tregs are significantly more potent at reducing transplant rejection (8, 9). We and others  
7 developed a strategy to generate antigen-specific Tregs using Chimeric Antigen Receptors  
8 (CARs), synthetic fusion proteins that redirect T cell specificity. CAR-Tregs are more effective  
9 than polyclonal Tregs at limiting xenogeneic graft-versus-host disease (xeno-GVHD) (10-12), as  
10 well as skin and heart transplant rejection (13-17), and have rapidly transitioned to clinical  
11 testing with two ongoing phase I/IIa clinical trials (NCT04817774, NCT05234190) (18).

12 CARs typically comprise an extracellular single-chain antibody (scFv) domain, a hinge, a  
13 transmembrane domain and customizable intracellular signaling domains. They have been  
14 extensively studied in the context of cancer immunotherapy, initially as so-called first-generation  
15 CARs encoding only a CD3 $\zeta$  domain, and subsequently as second- or third-generation CARs  
16 adding one or more co-stimulatory domains, respectively (19, 20). In the context of  
17 transplantation, the optimal CAR design for Tregs is still under debate(8, 21). We recently  
18 explored the function of CARs encoding different co-stimulatory domains in human Tregs using  
19 an immunodeficient mouse model of xenoGVHD and demonstrated that a second generation  
20 CD28-CD3 $\zeta$ -encoding CAR was optimal in terms of Treg potency, stability and persistence (10).  
21 Similar results were found in other studies using PBMC-reconstitution-based, humanized mouse  
22 and skin xenograft models (11, 16). However, drawing clinically-relevant conclusions is  
23 complicated in these models due to their immunodeficient state and because PBMC

1 reconstitution primarily results in T cell engraftment, with poor/no reconstitution of antigen-  
2 presenting cells (APCs), including B cells and dendritic cells (DCs) (22-25).

3            Suppressing the ability of APCs to activate effector T cells is a primary mechanism by  
4 which Tregs maintain peripheral tolerance (2, 26). Tregs suppress APCs using a range of  
5 strategies including CTLA-4-mediated transendocytosis of CD80/86 (27, 28), trogocytosis of  
6 MHC class II (29, 30) and suppression of cytokine production (31). Tregs also control the  
7 generation of donor-specific anti-HLA antibodies (DSA) by directly suppressing B cell function  
8 (32, 33), inducing B cell apoptosis (32) and/or inhibiting follicular helper cells (34-38). APCs  
9 (39-41) and DSAs (42, 43) both have critical roles in transplant rejection, so identifying the  
10 optimal CAR-Treg design to regulate these cells and processes is an important outstanding  
11 question (44).

12            In this study, we used a mouse model of HLA-A2<sup>+</sup> skin transplantation to study the  
13 structure-function relationship of CAR-Tregs. HLA-A2-specific CARs with different co-  
14 stimulatory domains were expressed in Tregs and studied in vitro and in vivo in an  
15 immunocompetent setting. We explored how CAR-Tregs integrate signals from exogenous and  
16 endogenous sources and how signal origin shapes function.

## 1 RESULTS

### 2 *Generation of co-stimulation domain variant CAR-Tregs in mice.*

3 We generated eight HLA-A2-specific CAR variants containing different transmembrane and co-  
4 stimulatory domains derived from CD28 and TNFR family proteins that have relevance to Treg  
5 biology (45) (**Fig 1A**). CAR variants were cloned into a bicistronic retroviral vector upstream of  
6 a mKO2 reporter. CD4<sup>+</sup>CD8<sup>-</sup>Thy1.1<sup>+</sup>Foxp3<sup>gfp+</sup> Tregs were sorted, polyclonally stimulated,  
7 transduced and expanded (**Supplemental Fig 1**). Control Tregs and conventional T cells  
8 (Tconvs) were expanded in a similar manner but transduced with an irrelevant CAR or left  
9 untransduced.

10 Treg transduction and CAR expression were measured by expression of the CAR-  
11 encoded extracellular Myc tag and mKO2 (**Fig 1B; Supplemental Fig 2A**). With the exception  
12 of CTLA4- and TNFR2-encoding CARs (**Supplemental Fig 2B**, not analyzed further), CAR  
13 variants were detected on the cell surface and bound to HLA-A2 tetramers (**Fig 1B**). After  
14 expansion, on average, ~70% of cells expressed a CAR (**Supplemental Fig 2C**). Expression  
15 levels of OX40- and 41BB-encoding CARs, and the control HER2 CAR, were lower than the  
16 CD28-encoding CAR (**Fig 1C**), but there were no differences in gfp (Foxp3 reporter) or  
17 intracellular Foxp3 expression, demonstrating high Treg purity following transduction and  
18 expansion (**Fig 1D&E**).

### 19 *Co-stimulatory CAR variants differ in their ability to stimulate Tregs.*

20 To assess CAR variant function, CAR-Tregs were labelled with CPDeF450 and co-cultured with  
21 irradiated HLA-A2<sup>pos</sup> K562 cells for 72 hrs. Only Tregs expressing a CAR proliferated in  
22 response to HLA-A2 (**Fig 2A**). Differences in Treg proliferation were observed, with the CD28-  
23 encoding CAR inducing the strongest proliferative response, followed by the ICOS-encoding

1 CAR (**Fig 2B**). TNFR-family co-stimulatory CARs (OX40, GITR and 4-1BB) induced a  
2 moderate proliferative response (**Fig 2B**), whilst the PD1-encoding CAR induced little  
3 proliferation, corroborating our previous study in human Tregs (10) and other studies in CAR-T  
4 cells (46).

5 Analysis of cell culture supernatants revealed that Tregs expressing the CD28-encoding  
6 CAR secreted the highest levels of IL10. CARs encoding TNFR family domains (OX40, GITR,  
7 4-1BB) induced medium levels of IL10 and PD1- and ICOS-encoding CARs induced the lowest  
8 (**Fig 2C-left**). Low levels of IL17A were secreted by Tregs expressing the ICOS- and PD1-  
9 encoding CARs, contrasting with a previous study performed with CAR-T cells that showed an  
10 ICOS-encoding CAR induced high IL17A production (47) (**Fig 2C-right**). In comparison to A2-  
11 CAR T cells, none of the CAR-Tregs variants secreted significant amounts of pro-inflammatory  
12 cytokines or IL-2 (**Supplemental Fig 3A**).

13 To test how CAR signaling influenced Treg function, antigen-dependent, linked  
14 suppression assays were performed where the ability of CAR-Tregs to inhibit OTII CD4<sup>+</sup> T cell  
15 proliferation was measured (**Fig 2D**). Tregs expressing the CD28-based CAR exhibited the  
16 greatest suppressive function (**Fig 2E; Supplemental Fig 3B**). Tregs expressing the other CARs  
17 varied in their suppressive capacity. PD1-encoding CAR-Tregs were the least suppressive, but  
18 remained more suppressive than the polyclonal HER-CAR or untransduced Treg controls. Thus,  
19 as we previously found in human CAR-Tregs(10), in an in vitro setting, CAR-Treg activation is  
20 strongly influenced by the CAR co-stimulatory domain.

### 21 *In vivo effects of Tregs expressing co-stimulatory CAR variants on skin rejection*

22 We next compared the function of CAR-Treg variants using an immunocompetent mouse model  
23 of allogeneic skin transplantation (15). Wild-type Bl/6 mice received HLA-A2<sup>+</sup> Bl/6 skin grafts

1 and were intravenously administered with  $1 \times 10^6$  CAR-Tregs. Consistent with our previous study  
2 (15), CAR-Tregs delayed, but did not prevent skin rejection: median survival time was 20 days  
3 for mice treated with A2.CD28 $\zeta$  CAR-Tregs versus 14 days for PBS (**Fig 3A-left**). CAR-Tregs  
4 encoding other CD28-family domains, ICOS or PD1, also delayed skin rejection with median  
5 survival times of 20 days for ICOS and 19.5 for PD1. On the other hand, with the exception of  
6 GITR, Tregs encoding CARs with TNFR family-derived domains failed to extend graft survival.  
7 The median survival times were 14 days for OX40-, 17 days for 41BB- and 19.5 days for GITR-  
8 encoding CAR-Tregs (**Fig 3A-right**). Overall, no other CAR-Treg extended graft survival  
9 significantly longer than A2.CD28 $\zeta$  CAR-Tregs (**Supplemental Table 1**).

10 DSAs are important mediators of organ rejection (42) so CAR-Treg control of anti-HLA-  
11 A2 IgG generation was assessed. Mice treated with A2.CD28 $\zeta$  CAR-Tregs had significantly  
12 lower levels of anti-HLA-A2 IgG compared to PBS mice (**Fig 3B**), corroborating our previous  
13 observations (15). Conversely, no other CAR-Treg tested significantly reduced the levels of anti-  
14 HLA-A2 IgG compared to PBS mice. Seeking to assess if there was a correlation between  
15 control of anti-HLA-A2 IgG and graft rejection, a regression analysis was performed revealing a  
16 negative correlation between amounts of anti-HLA-A2 IgG and graft survival (**Supplemental**  
17 **Fig 4A**). Interestingly, when this analysis was performed separately for CD28- versus TNFR-  
18 family encoding CARs, the correlation was only present for the former (**Fig 3C**).

19 CAR-Treg persistence and phenotype were tracked in blood on a weekly basis. Only  
20 Tregs expressing ICOS- or PD1-encoding CARs persisted significantly less than A2.CD28 $\zeta$   
21 CAR-Tregs (**Fig 3D; Supplemental Fig 4B**). With the exception of the A2.OX40 $\zeta$  CAR, there  
22 were no differences in the proportion of CAR-expressing Tregs (**Fig 3E**). Expression of Foxp3

1 and Helios were equivalent between all CAR-Treg groups, showing that none of the co-  
2 stimulatory domains negatively affected Treg stability *in vivo* (**Fig 3F**).

3 *A co-stimulatory domain is dispensable for CAR-Treg function in vivo*

4 The minimal differences between some CAR-Tregs variants in this immunocompetent setting  
5 contrast with the *in vitro* data in this study and previous studies that used immunodeficient  
6 mouse models, both of which clearly showed a superior function of CD28-encoding CARs (10,  
7 11, 16, 48). Seeking to understand the mechanistic basis for these findings, we hypothesized that  
8 CAR-Tregs may receive additional signals *in vivo* that compensated for weaker CAR-mediated  
9 activation. To address this possibility, we tested a first-generation CAR (A2.ζ CAR) that lacked  
10 a co-stimulatory domain (**Fig 4A**) and performed direct comparisons with the second-generation  
11 A2.28ζ CAR. The A2.ζ and A2.28ζ CARs were expressed at similar levels and no differences in  
12 Foxp3<sup>gfp</sup> expression were observed (**Supplemental Fig 5A**). *In vitro* assays revealed that upon  
13 stimulation with HLA-A2<sup>pos</sup> K562 cells, A2.ζ CAR-Tregs had significantly lower proliferation  
14 and cytokine secretion than A2.28ζ CAR-Tregs (**Fig 4B; Supplemental Fig 5B**). When tested in  
15 the OTII linked suppression assay there was a trend to lower antigen-specific suppression with  
16 A2.ζ compared to A2.28ζ CAR-Tregs (**Fig 4C; Supplemental Fig 5C**).

17 Following adoptive transfer into an immunocompetent skin transplant model, A2.ζ and  
18 A2.28ζ-CAR Tregs were equal in their ability to delay skin rejection (median survival time of 20  
19 days for both vs 14 days for PBS mice) (**Fig 4D**). Additionally, A2.ζ and A2.28ζ CAR Tregs  
20 were similarly able to suppress the generation of anti-HLA-A2 IgG antibodies (**Figure 4E**) and  
21 there was a strong correlation between anti-HLA-A2 IgG levels and graft rejection  
22 (**Supplemental Fig 6A**). There was a trend, although not significant, to lower persistence of



1 A2.ζ CAR-Tregs (**Fig 4F; Supplemental Fig 6B**) and no differences in expression of the CAR  
2 (**Fig 4G**), Foxp3 and Helios (**Fig 4I**) or functional markers (**Supplemental Fig 6C**). Together,  
3 these results suggest CAR-encoded co-stimulation is redundant for CAR-Treg function in an  
4 immunocompetent model.

### 5 *CAR-Tregs integrate exogenous and CAR-encoded co-stimulation*

6 A fundamental difference between our in vivo studies and those previously performed with  
7 humanized mice is that the latter lacks professional APCs. As such, we hypothesized that in an  
8 immunocompetent in vivo setting, CD28 naturally-expressed by the CAR-Tregs may engage  
9 CD80/86 on APCs and compensate for a weak/absent CAR-encoded co-stimulatory signal. To  
10 investigate this possibility, A2.ζ- or A2.28ζ-CAR Tregs were stimulated with HLA-  
11 A2<sup>pos</sup>CD86<sup>neg</sup> or HLA-A2<sup>pos</sup>CD86<sup>pos</sup> K562s, after which proliferation and activation were  
12 determined by the expression of Ki67, CTLA-4, PD1 and LAP (**Fig 5A**). In the absence of  
13 exogenous CD86, A2.28ζ-CAR Tregs were significantly more activated and proliferative than  
14 A2.ζ-CAR Tregs (**Fig 5B; Supplemental Fig 7A**). However, in presence of CD86 these  
15 differences diminished with the first- and second-generation CAR-Tregs showing similar levels  
16 of activation and proliferation (**Fig 5B; Supplemental Fig 7A**). To further validate these  
17 findings, Tregs were stimulated with HLA-A2<sup>pos</sup>CD86<sup>pos</sup> K562s in the presence of CTLA4-Ig to  
18 block CD86. CTLA4-Ig treatment reduced the proliferation and activation of A2.ζ-CAR Tregs to  
19 similar levels found in absence of CD86 (**Fig 5B&C; Supplemental Fig 7A&B**). The inhibitory  
20 effect CTLA-Ig was overcome by adding an agonistic anti-CD28 mAb able to induce CD28-  
21 signaling independently of CD86.

22 Having shown that co-stimulation through native CD28 can act in conjunction with CAR-  
23 mediated CD3ζ signaling to fully activate Tregs, we next asked how CD28 signaling combines

1 with signals from other co-stimulatory domain CARs. Corroborating our previous findings,  
2 Tregs encoding different CD28- or TNFR-family CARs were activated to differing degrees upon  
3 co-culture with HLA-A2<sup>pos</sup>CD86<sup>neg</sup> K562s. However, these differences were reduced in the  
4 presence of HLA-A2<sup>pos</sup>CD86<sup>pos</sup> K562s, demonstrating that the function of CAR-Tregs is  
5 influenced by both CAR stimulation and CD86 engagement (**Fig 5D**; **Supplementary Fig 8A**).

6 It has previously been shown that CARs encoding a CD28-derived transmembrane (TM)  
7 domain can dimerize with endogenous CD28(49). To exclude the possibility that our  
8 observations could be related to interactions between the CAR CD28 TM and native CD28,  
9 resulting in the presence of a CD28 signal even in the absence of a CAR-encoded CD28  
10 endodomain, we generated new CARs encoding a CD8 $\alpha$ -derived TM (**Fig 5E**). Tregs expressing  
11 the indicated CARs were stimulated with HLA-A2<sup>pos</sup>CD86<sup>neg</sup> or HLA-A2<sup>pos</sup>CD86<sup>pos</sup> K562 cells,  
12 revealing that first-generation CARs with CD8 $\alpha$  TM domains are similarly able to respond to  
13 exogenous CD28 stimulation (**Fig 5F**; **Supplemental Fig 8B**) suggesting a minimal impact of  
14 the type of TM in this process.

15 To further confirm that co-stimulatory domains in a CAR are dispensable for Tregs if co-  
16 stimulation is provided by natural APCs (i.e. rather than K562 cells), we analyzed the ability of  
17 A2.28 $\zeta$  and A2. $\zeta$  CAR-Tregs to inhibit the antigen-presenting capacity of DCs. CAR-Tregs were  
18 co-cultured with HLA-A2<sup>+</sup>CD11c<sup>+</sup> DCs for 24-48 hrs, after which the expression of CD80,  
19 CD86 and MHC class-II in the DCs was assessed (**Fig 6A-B**). A2.28 $\zeta$ - and A2. $\zeta$ -CAR Tregs  
20 were equally able to suppress CD80, CD86 (**Fig 6C**) and MHC-II expression (**Supplementary**  
21 **Fig 9A**). This effect was consistent at different time points and different CAR-Tregs/DCs ratios  
22 (**Supplemental Fig 9B**). In concordance with previous results, the suppressive effect of A2. $\zeta$ -  
23 CAR Tregs was strongly inhibited by CTLA4-Ig (**Fig 6D**).

## 1 **DISCUSSION**

2 Understanding how the structure of a CAR affects Treg function is critical to guide their clinical  
3 implementation. Here we studied how different CAR co-stimulatory domains affect Treg  
4 function in an immunocompetent mouse model of skin transplantation. Whilst 4-1BB- and  
5 OX40-encoding CAR-Tregs did not have a significant therapeutic effect, CD28-, ICOS-, PD1-  
6 and GITR-encoding CAR-Tregs were similarly efficacious *in vivo*. Further comparisons between  
7 Tregs expressing a first (A2.ζ) or second (A2.28ζ) generation CAR revealed equivalent function,  
8 leading us to study a possible role for co-stimulation via the native CD28 receptor. These studies  
9 showed that native CD28 signaling can compensate for a lack of CAR-mediated co-stimulation,  
10 providing a significant advance in our understanding of how CAR-Tregs interact with host  
11 immune cells and regulate alloimmunity.

12 We and others previously compared the function of CARs encoding different co-  
13 stimulatory domains in Tregs using immunodeficient mouse models and found that a CD28 co-  
14 stimulatory domain was optimal for Treg potency, stability, persistence and *in vivo* function (10,  
15 11, 16, 48). CARs carrying alternative co-stimulatory domains had limited *in vitro* and *in vivo*  
16 function (10, 11, 16, 48). In contrast, in the immunocompetent transplant setting used here, Tregs  
17 expressing CARs encoding co-stimulatory domains from ICOS, PD1 or GITR were similar to  
18 CD28 in terms of protection from skin rejection (although not DSA generation). This finding  
19 was particularly intriguing for the PD1-encoding CAR, since it only weakly activates T cells (46)  
20 and Tregs (10). Our data suggest that, at least for some CARs, this could be related to the  
21 combination of native CD28 and CAR-mediated signaling, with the former compensating for  
22 lower CAR-mediated activation.

1 CD28 is a major co-stimulatory receptor for Tregs (50-53), but these cells express a  
2 variety of costimulatory molecules (54, 55) that have positive or negative effects (54, 56). Thus,  
3 it is possible that certain combinations of co-stimulatory signaling driven by the CAR and/or  
4 natural co-receptors could be harmful and cause Treg dysfunction(48). Indeed, in previous  
5 studies using immunodeficient mouse models, CARs carrying co-stimulatory domains from  
6 TNFR family members, such as 41BB, showed no therapeutic protection (10, 11, 16, 48) and  
7 were associated with exhaustion (48) and loss of Treg stability (10, 48). Similarly, in our  
8 immunocompetent transplant setting, CARs encoding costimulatory domains from 41BB and  
9 OX40 showed no protection from graft rejection or control of DSAs generation. However, there  
10 were also no signs of tonic signaling or loss of Foxp3 or Helios expression even after 4 weeks  
11 after adoptive transfer. Thus, in vivo co-stimulation from the CD28 receptor might overcome the  
12 deleterious effect of these otherwise harmful co-stimulatory signals (57).

13 CARs were originally developed for use in cancer with the goal of directing T cells to kill  
14 tumor cells (58). These tumor cells often overexpress coinhibitory receptors as an immune  
15 escape mechanism and may not express costimulatory molecules such as CD80 or CD86 (59,  
16 60). As such, first-generation CARs lacking co-stimulation showed modest outcomes in a cancer  
17 setting (61-63) and the provision of co-stimulation in a second-generation CAR format greatly  
18 increased their clinical success (64). In Tregs, studies of first-generation CARs are limited, with  
19 only one study in immunodeficient mice showing little protection from xenogeneic GvHD (10).  
20 Conversely, we found that in an immunocompetent mouse setting, first- and second-generation  
21 CAR-Tregs offer the same protection from rejection. Distinct from CAR T-cells, APCs are a  
22 major target for Treg suppression (44), leading us to speculate that first-generation CAR-Tregs  
23 could receive natural co-stimulation via these cells. This possibility is supported by our in vitro

1 data with Tregs showing that native CD28 co-stimulation compensates for absent CAR-encoded  
2 co-stimulation. Similar findings were reported with CAR-T cells in vitro (65, 66): if co-  
3 stimulatory molecules are provided, first- and second-generation CARs equivalently activate T  
4 cells. Collectively these data highlight that in vivo, CAR-Treg function is ultimately determined  
5 by an integrated response to CAR- and native co-stimulation-mediated signaling.

6 An outstanding question is where would CAR-Tregs encounter donor antigen and co-  
7 stimulation? Skin-resident APCs play an important role in the regulation of alloimmunity (67-70)  
8 and in our immunocompetent skin graft model, these cells could deliver both CAR and co-  
9 stimulatory signals to CAR-Tregs. Skin donor APCs could also migrate to surrounding lymphoid  
10 nodes (LN) (71) and/or host APCs could be cross-dressed with HLA-A2 via exosome-mediated  
11 mechanisms (72-74). The fact that first and CD28-based second-generation CAR-Tregs were  
12 both able to control DSA generation suggests that CAR-Tregs migrating to LNs not only receive  
13 CAR signals but also co-stimulation.

14 Notably, CAR-Treg therapy delayed graft rejection but did not induce indefinite graft  
15 survival. Similar results have been reported by previous studies using different models of  
16 transplantation (8, 9). A potential reason for this could be the inability of CAR-Tregs to control  
17 the high numbers of alloreactive T cells generated after transplantation, an issue that can be  
18 resolved by administering cytotoxic or immunosuppressive preconditioning treatments before  
19 infusing Tregs (75, 76). Another reason could be the high stringency of immunocompetent  
20 transplant mouse models of transplantation, particularly of the skin allograft model. Studies  
21 exploring the use of A2-CAR Tregs alone in a single HLA-A2-mismatched heart transplant  
22 model also failed to induce long-term tolerance but extended graft protection longer than our  
23 skin allograft model (17). However, skin allograft models facilitate testing of multiple CAR-Treg

1 groups in parallel which is not feasible with other less-stringent transplant models due to their  
2 complexity.

3 Another potential factor limiting for CAR-Tregs is their short in vivo persistence, which  
4 could be driven by multiple mechanisms. CAR-Tregs uptake HLA-A2 molecules by trogocytosis  
5 (15), thus the resulting HLA-A2<sup>+</sup> CAR-Tregs could become targets for anti-HLA-A2 Abs and be  
6 depleted. Low IL-2 levels of IL-2 could impact CAR-Treg persistence (77), as could diminishing  
7 levels of the target antigen which may become limiting as rejection progresses. A consideration  
8 is that the persistence data reported here were from blood so may not capture cells which have  
9 re-localized to tissues. Overall, investigation of strategies to enhance persistence, such as by  
10 repeat dosing, or co-administration of adjunct therapies such as IL-2, is warranted.

11 Overall, our results contribute to the understanding of how alternative co-stimulatory  
12 domains impact the in vivo function of CAR-Tregs and demonstrate that CAR-mediated co-  
13 stimulation in Tregs is not essential for in vivo function. These data provide an important step  
14 forward in our understanding of the biology of CAR-Tregs and how to best optimize them for  
15 clinical applications.

16

## 17 **METHODS**

18 *Generation of signaling domain CAR variants.* CAR variants were generated by replacing the  
19 transmembrane and co-stimulatory domains of a previously characterized A2-specific CAR (10,  
20 15). Domain sequences were obtained from Uniprot and codon optimized for mouse  
21 (**Supplemental Table 2**). The resulting CARs encoded an A2-specific scFv (12), a CD8 $\alpha$ -  
22 derived hinge, a c-Myc epitope tag, the indicated transmembrane and co-stimulatory domains,  
23 and CD3 $\zeta$ . A HER2-specific CAR served as an antigen-non-specific negative control (10, 15).

1 CARs were cloned into an MSCV-based vector upstream of an IRES-monomeric Kusabira-  
2 Orange2 (mKO2) reporter and retroviral particles were generated as described (15).

3

4 *Animals.* Bl/6, Bl/6-Foxp3<sup>gfp</sup> × Thy1.1 Bl/6, HLA-A2<sup>+</sup> Bl/6 mice (B6.Cg-Tg(HLA-A/H2-  
5 D)2Eng<sup>e</sup>/J) and OTII Bl6 mice (B6.Cg-Tg(TcraTcrb)425Cbn/J) were purchased from Jackson  
6 Laboratories and bred in-house under specific pathogen-free conditions.

7

8 *CAR-Treg generation.* CAR-Tregs were generated as described (15, 78). Briefly, lymph nodes  
9 and spleen from 16-24-week-old female or male C57Bl/6-Foxp3<sup>gfp</sup> × Thy1.1 mice were collected  
10 and CD4<sup>+</sup> T cells isolated by negative selection (STEMCELL Technologies). Tregs were sorted  
11 as live CD4<sup>+</sup>CD8<sup>-</sup>Thy1.1<sup>+</sup>Foxp3<sup>gfp</sup> using a MoFlow® Astrios (Beckman Coulter)  
12 (**Supplemental Figure 1A**), stimulated with anti-CD3/CD28 dynabeads (ThermoFisher  
13 Scientific), expanded in the presence of recombinant human IL-2 (1000 U/mL, Proleukin) and  
14 rapamycin (50 nmol/L, Sigma-Aldrich), and transduced after 2 days. Dynabeads were removed  
15 on day 7 and cells were rested overnight in 1000U/mL, or 100U/mL for 2 days, prior to use for  
16 in vivo or in vitro assays, respectively. CAR expression and Treg purity were determined after  
17 expansion (**Supplemental Figure 1B**).

18

19 *Proliferation, activation and cytokine production.* CAR-Tregs were labelled with CPDeFluor450  
20 proliferation dye (eBioscience), then stimulated with irradiated (125 Gy) HLA-A2<sup>pos</sup>CD86<sup>neg</sup>,  
21 HLA-A2<sup>pos</sup>CD86<sup>pos</sup> or HLA-A2<sup>neg</sup>CD86<sup>neg</sup> K562 cells at a 1:2 (K562:Treg) ratio with 100 U/mL  
22 IL-2. After 72 hrs activation markers and proliferation (CPDe450 dilution or Ki67 expression)  
23 were assessed by flow cytometry and cell culture supernatants were collected to measure

1 cytokine secretion using a cytometric bead array (BD Biosciences). Where stated, CTLA4-Ig  
2 (Orencia) and/or an anti-CD28 agonist antibody (Clone:37.51, BD bioscience) were added at 10  
3  $\mu\text{g}/\text{mL}$ .

4  
5 *Suppression assays.* For T cell suppression, responder  $\text{CD4}^+$  T cells were isolated from OTII  
6 BL/6 mice by negative selection (STEMCELL Technologies). Splenocytes from wild-type or  
7 HLA-A2<sup>+</sup> BL/6 mice were depleted of Thy1.2<sup>+</sup> cells (STEMCELL Technologies), irradiated (20  
8 Gy) and 175,000 were co-cultured with 25,000 OTII T cells with 200 ng/mL OVA<sub>323-339</sub> peptide  
9 (Sigma-Aldrich) and varying ratios of Tregs. OTII proliferation was measured by flow cytometry  
10 after 4 days and % suppression was calculated as the inhibition of T responder proliferation,  
11 relative to T responders cultured without Tregs.

12 For DC suppression, splenic  $\text{CD11c}^+$  DCs were isolated by positive selection  
13 (STEMCELL Technologies) from wild-type or HLA-A2<sup>+</sup> BL/6 mice and cultured with CAR-  
14 Tregs (1:2 or 1:5 DC:Treg ratio). Suppressive effects of CAR-Tregs were measured as %  
15 decreased expression of costimulatory (CD80 and CD86) and MHC-II molecules on DCs after 1  
16 and/or 2 days.

17 *Skin transplantation.* 10-14-week-old female and male wild-type C57BL/6 mice were  
18 transplanted with dorsal skin grafts from sex-matched, wild-type or HLA-A2<sup>+</sup> BL/6 mice. Where  
19 stated, mice were injected with  $1 \times 10^6$  CAR-Tregs (equivalent to 30-50  $\times 10^6/\text{kg}$ ) into the tail vein  
20 at the time of transplantation (15). Grafts were covered with a petroleum jelly gauze patch and  
21 wrapped with CoFlex bandage (3M, Nexcare). Bandages were removed after 10-days and grafts  
22 monitored for rejection until 30 days post-transplantation. Graft rejection was defined as  
23 described(15). Peripheral blood and plasma were collected weekly to track CAR-Tregs and



1 antibodies. Red blood cells were lysed using ammonium chloride and Fc receptors were blocked  
2 using anti-mouse CD16/CD32 (BD Bioscience) before staining.

3

4 *Anti-HLA-A2 IgG quantification.* Anti-HLA-A2 IgG titers were determined using a cell-based  
5 ELISA. HLA-A2<sup>pos</sup> K562 and control K562 cells were seeded in a 96-well plate and blocked  
6 with rat serum (STEMCELL) for 30 mins at RT. Plasma samples were added (1:800 dilution)  
7 and incubated for 1 hour at RT. A goat anti-mouse IgG APC secondary antibody (Invitrogen)  
8 was added (1:700 dilution) and incubated for 1 hour at RT. A standard curve was made using  
9 purified anti-HLA-A2 antibody (BD, clone:BB7.2). Cells were analyzed by flow cytometry and  
10 concentration was calculated based on MFI using a 4PL curve.

11

12 *Flow cytometry.* Flow cytometry was performed in adherence to “Guidelines for the use of flow  
13 cytometry and cell sorting in immunological studies (third edition)” (79). Flow cytometric  
14 antibodies are shown in **Supplemental Table 3**. Cells were extracellularly stained in presence of  
15 Fixable Viability Dye (FVD) eFluor™ 780 (ThermoFisher Scientific) to exclude dead cells.  
16 Staining for intracellular markers was performed using the Foxp3/Transcription Factor Staining  
17 Buffer Set (Thermo Fisher Scientific). Data were acquired using an LSR Fortessa II, A5  
18 Symphony (BD Biosciences) or CytoFLEX (Beckman Coulter), and analyzed using FlowJo  
19 version 10.7.1 (Tree Star).

20

21 *Statistics.* Data were analyzed using GraphPad Prism 9.3.1 and are shown as mean±SEM.

22 Statistical significance were determined using Pearson correlation, one-way and two-way

1 analysis of variance (ANOVA) with a Holm-Sidak post-test or by log-rank (Mantel-Cox) test for  
2 survival curve comparisons.

3

4 *Study Approval.* Animal experiments were approved by the University of British Columbia

5 Animal Care and Use Committee (A19-0136).

6

7

8

## 1 **Acknowledgements**

2 Supported by grants from the US Department of Defense (W81XWH-19-1-0351) and the  
3 Canadian Institutes for Health Research (FDN-154304). IRS and DAB are supported by salary  
4 awards from the Canadian Institutes for Health Research and Michael Smith Health Research  
5 BC. MKL receives a salary award from the BC Children's Hospital Research Institute and is a  
6 Canada Research Chair in Engineered Immune Tolerance. Some figures were created with  
7 BioRender (<http://biorender.com>)

8

9 **Disclosure.** MKL holds provisional patents relating to use of CARs in Tregs. MKL has also  
10 received research funding from Sangamo, Takeda, Bristol Myers Squibb, and CRISPR  
11 Therapeutics for work not related to this study.

12

## 1 REFERENCES:

- 2 1. Lam AJ, Hoeppli RE, and Levings MK. Harnessing Advances in T Regulatory Cell  
3 Biology for Cellular Therapy in Transplantation. *Transplantation*. 2017;101(10):2277-87.
- 4 2. Raffin C, Vo LT, and Bluestone JA. Treg cell-based therapies: challenges and  
5 perspectives. *Nature Reviews Immunology*. 2020;20(3):158-72.
- 6 3. Ferreira LMR, Muller YD, Bluestone JA, and Tang Q. Next-generation regulatory T cell  
7 therapy. *Nature Reviews Drug Discovery*. 2019;18(10):749-69.
- 8 4. Sawitzki B, Harden PN, Reinke P, Moreau A, Hutchinson JA, Game DS, et al.  
9 Regulatory cell therapy in kidney transplantation (The ONE Study): a harmonised design  
10 and analysis of seven non-randomised, single-arm, phase 1/2A trials. *Lancet*.  
11 2020;395(10237):1627-39.
- 12 5. Harden PN, Game DS, Sawitzki B, Van der Net JB, Hester J, Bushell A, et al. Feasibility,  
13 long-term safety, and immune monitoring of regulatory T cell therapy in living donor  
14 kidney transplant recipients. *Am J Transplant*. 2021;21(4):1603-11.
- 15 6. Sánchez-Fueyo A, Whitehouse G, Grageda N, Cramp ME, Lim TY, Romano M, et al.  
16 Applicability, safety, and biological activity of regulatory T cell therapy in liver  
17 transplantation. *Am J Transplant*. 2020;20(4):1125-36.
- 18 7. Roemhild A, Otto NM, Moll G, Abou-El-Enain M, Kaiser D, Bold G, et al. Regulatory T  
19 cells for minimising immune suppression in kidney transplantation: phase I/IIa clinical  
20 trial. *BMJ*. 2020;371:m3734.
- 21 8. Rosado-Sánchez I, and Levings MK. Building a CAR-Treg: Going from the basic to the  
22 luxury model. *Cellular Immunology*. 2020;358(September).
- 23 9. Dawson NAJ, Vent-Schmidt J, and Levings MK. Engineered tolerance: Tailoring  
24 development, function, and antigen-specificity of regulatory T cells. *Frontiers in*  
25 *Immunology*. 2017;8.
- 26 10. Dawson NAJ, Rosado-Sánchez I, Novakovsky GE, Fung VCW, Huang Q, McIver E, et  
27 al. Functional effects of chimeric antigen receptor co-receptor signaling domains in  
28 human Tregs. *Sci Transl Med*. 2020;12(557).
- 29 11. Imura Y, Ando M, Kondo T, Ito M, and Yoshimura A. CD19-targeted CAR regulatory T  
30 cells suppress B cell pathology without GvHD. *JCI Insight*. 2020;5(14).
- 31 12. MacDonald KG, Hoeppli RE, Huang Q, Gillies J, Luciani DS, Orban PC, et al.  
32 Alloantigen-specific regulatory T cells generated with a chimeric antigen receptor.  
33 *Journal of Clinical Investigation*. 2016;126(4):1413-24.

- 1 13. Boardman DA, Philippeos C, Fruhwirth GO, Ibrahim MAA, Hannen RF, Cooper D, et al.  
2 Expression of a Chimeric Antigen Receptor Specific for Donor HLA Class I Enhances  
3 the Potency of Human Regulatory T Cells in Preventing Human Skin Transplant  
4 Rejection. *American Journal of Transplantation*. 2017;17(4):931-43.
- 5 14. Noyan F, Zimmermann K, Hardtke-Wolenski M, Knoefel A, Schulde E, Geffers R, et al.  
6 Prevention of Allograft Rejection by Use of Regulatory T Cells With an MHC-Specific  
7 Chimeric Antigen Receptor. *American Journal of Transplantation*. 2017;17(4):917-30.
- 8 15. Sicard A, Lamarche C, Speck M, Wong M, Rosado-Sánchez I, Blois M, et al. Donor-  
9 specific chimeric antigen receptor Tregs limit rejection in naive but not sensitized  
10 allograft recipients. *American Journal of Transplantation*. 2020(January):1-12.
- 11 16. Boroughs AC, Larson RC, Choi BD, Bouffard AA, Riley LS, Schiferle E, et al. Chimeric  
12 antigen receptor costimulation domains modulate human regulatory T cell function. *JCI*  
13 *Insight*. 2019;5(8).
- 14 17. Wagner JC, Ronin E, Ho P, Peng Y, and Tang Q. Anti-HLA-A2-CAR Tregs prolong  
15 vascularized mouse heterotopic heart allograft survival. *Am J Transplant*.  
16 2022;22(9):2237-45.
- 17 18. Schreeb K, Culme-Seymour E, Ridha E, Dumont C, Atkinson G, Hsu B, et al. Study  
18 Design: Human Leukocyte Antigen Class I Molecule A. *Kidney Int Rep*. 2022;7(6):1258-  
19 67.
- 20 19. Guedan S, Calderon H, Posey AD, and Maus MV. Engineering and Design of Chimeric  
21 Antigen Receptors. *Molecular Therapy - Methods and Clinical Development*.  
22 2018;12:145-56.
- 23 20. Rafiq S, Hackett CS, and Brentjens RJ. Engineering strategies to overcome the current  
24 roadblocks in CAR T cell therapy. *Nature Reviews Clinical Oncology*. 2020;17(3):147-  
25 67.
- 26 21. Boardman DA, and Levings MK. Emerging strategies for treating autoimmune disorders  
27 with genetically modified Treg cells. *J Allergy Clin Immunol*. 2022;149(1):1-11.
- 28 22. Søndergaard H, Kvist PH, and Haase C. Human T cells depend on functional calcineurin,  
29 tumour necrosis factor- $\alpha$  and CD80/CD86 for expansion and activation in mice. *Clin Exp*  
30 *Immunol*. 2013;172(2):300-10.
- 31 23. Walsh NC, Kenney LL, Jangalwe S, Aryee KE, Greiner DL, Brehm MA, et al.  
32 Humanized Mouse Models of Clinical Disease. *Annu Rev Pathol*. 2017;12:187-215.
- 33 24. Kenney LL, Shultz LD, Greiner DL, and Brehm MA. Humanized Mouse Models for  
34 Transplant Immunology. *Am J Transplant*. 2016;16(2):389-97.

- 1 25. Shultz LD, Keck J, Burzenski L, Jangalwe S, Vaidya S, Greiner DL, et al. Humanized  
2 mouse models of immunological diseases and precision medicine. *Mamm Genome*.  
3 2019;30(5-6):123-42.
- 4 26. Vignali DAA, Collison LW, and Workman CJ. How regulatory T cells work. *Nature*  
5 *Reviews Immunology*. 2008;8(7):523-32.
- 6 27. Qureshi OSZ, Yong, Nakamura K, Attridge K, Manzotti C, Schmidt EM, Baker J, et al.  
7 Trans-endocytosis of CD80 and CD86: A molecular basis for the cell-extrinsic function  
8 of CTLA-4. *Science*. 2011;332(6029):600-3.
- 9 28. Tekguc M, Wing JB, Osaki M, Long J, and Sakaguchi S. Treg-expressed CTLA-4  
10 depletes CD80/CD86 by trogocytosis, releasing free PD-L1 on antigen-presenting cells.  
11 *Proc Natl Acad Sci U S A*. 2021;118(30).
- 12 29. Liang B, Workman C, Lee J, Chew C, Dale BM, Colonna L, et al. Regulatory T cells  
13 inhibit dendritic cells by lymphocyte activation gene-3 engagement of MHC class II. *J*  
14 *Immunol*. 2008;180(9):5916-26.
- 15 30. Akkaya B, Oya Y, Akkaya M, Al Souz J, Holstein AH, Kamenyeva O, et al. Regulatory  
16 T cells mediate specific suppression by depleting peptide-MHC class II from dendritic  
17 cells. *Nat Immunol*. 2019;20(2):218-31.
- 18 31. Veldhoen M, Moncrieffe H, Hocking RJ, Atkins CJ, and Stockinger B. Modulation of  
19 dendritic cell function by naive and regulatory CD4+ T cells. *J Immunol*.  
20 2006;176(10):6202-10.
- 21 32. Iikuni N, Lourenço EV, Hahn BH, and La Cava A. Cutting edge: Regulatory T cells  
22 directly suppress B cells in systemic lupus erythematosus. *J Immunol*. 2009;183(3):1518-  
23 22.
- 24 33. Weingartner E, and Golding A. Direct control of B cells by Tregs: An opportunity for  
25 long-term modulation of the humoral response. *Cell Immunol*. 2017;318:8-16.
- 26 34. Wollenberg I, Agua-Doce A, Hernández A, Almeida C, Oliveira VG, Faro J, et al.  
27 Regulation of the germinal center reaction by Foxp3+ follicular regulatory T cells. *J*  
28 *Immunol*. 2011;187(9):4553-60.
- 29 35. Linterman MA, Pierson W, Lee SK, Kallies A, Kawamoto S, Rayner TF, et al. Foxp3+  
30 follicular regulatory T cells control the germinal center response. *Nat Med*.  
31 2011;17(8):975-82.
- 32 36. Wing JB, Ise W, Kurosaki T, and Sakaguchi S. Regulatory T cells control antigen-  
33 specific expansion of Tfh cell number and humoral immune responses via the coreceptor  
34 CTLA-4. *Immunity*. 2014;41(6):1013-25.

- 1 37. Sage PT, Paterson AM, Lovitch SB, and Sharpe AH. The coinhibitory receptor CTLA-4  
2 controls B cell responses by modulating T follicular helper, T follicular regulatory, and T  
3 regulatory cells. *Immunity*. 2014;41(6):1026-39.
- 4 38. Wang CJ, Heuts F, Ovcinnikovs V, Wardzinski L, Bowers C, Schmidt EM, et al. CTLA-  
5 4 controls follicular helper T-cell differentiation by regulating the strength of CD28  
6 engagement. *Proc Natl Acad Sci U S A*. 2015;112(2):524-9.
- 7 39. Alegre ML, Lakkis FG, and Morelli AE. Antigen Presentation in Transplantation. *Trends*  
8 *Immunol*. 2016;37(12):831-43.
- 9 40. Chakraverty R, and Sykes M. The role of antigen-presenting cells in triggering graft-  
10 versus-host disease and graft-versus-leukemia. *Blood*. 2007;110(1):9-17.
- 11 41. Lei YM, Sepulveda M, Chen L, Wang Y, Pirozzolo I, Theriault B, et al. Skin-restricted  
12 commensal colonization accelerates skin graft rejection. *JCI Insight*. 2019;5.
- 13 42. Loupy A, and Lefaucheur C. Antibody-Mediated Rejection of Solid-Organ Allografts. *N*  
14 *Engl J Med*. 2018;379(12):1150-60.
- 15 43. Loupy A, Hill GS, and Jordan SC. The impact of donor-specific anti-HLA antibodies on  
16 late kidney allograft failure. *Nat Rev Nephrol*. 2012;8(6):348-57.
- 17 44. Wardell M Christine MNK, Levings K Megan, Cook Laura. Cross talk between human  
18 regulatory T cells and antigen-presenting cells: Lessons for clinical applications. *Eur J*  
19 *Immunol*. 2021;51:27-38.
- 20 45. Wing JB, Tay C, and Sakaguchi S. Control of Regulatory T Cells by Co-signal  
21 Molecules. *Adv Exp Med Biol*. 2019;1189:179-210.
- 22 46. Fedorov VD, Themeli M, and Sadelain M. PD-1– and CTLA-4–Based Inhibitory  
23 Chimeric Antigen Receptors (iCARs) Divert Off-Target Immunotherapy Responses. *Sci*  
24 *Transl Med*. 2013;11(5).
- 25 47. Guedan S, Posey AD, Shaw C, Wing A, Da T, Patel PR, et al. Enhancing CAR T cell  
26 persistence through ICOS and 4-1BB costimulation. *JCI insight*. 2018;3(1).
- 27 48. Lamarthee B, Marchal A, Charbonnier S, Blein T, Leon J, Martin E, et al. Transient  
28 mTOR inhibition rescues 4-1BB CAR-Tregs from tonic signal-induced dysfunction. *Nat*  
29 *Commun*. 2021;12(1):6446.
- 30 49. Muller YD, Nguyen DP, Ferreira LMR, Ho P, Raffin C, Valencia RVB, et al. The CD28-  
31 Transmembrane Domain Mediates Chimeric Antigen Receptor Heterodimerization With  
32 CD28. *Front Immunol*. 2021;12:639818.

- 1 50. Hombach AA, Kofler D, Hombach A, Rappl G, and Abken H. Effective proliferation of  
2 human regulatory T cells requires a strong costimulatory CD28 signal that cannot be  
3 substituted by IL-2. *J Immunol.* 2007;179(11):7924-31.
- 4 51. Tang Q, Henriksen KJ, Boden EK, Tooley AJ, Ye J, Subudhi SK, et al. Cutting edge:  
5 CD28 controls peripheral homeostasis of CD4+CD25+ regulatory T cells. *J Immunol.*  
6 2003;171(7):3348-52.
- 7 52. Gogishvili T, Lühder F, Goebbels S, Beer-Hammer S, Pfeffer K, and Hünig T. Cell-  
8 intrinsic and -extrinsic control of Treg-cell homeostasis and function revealed by induced  
9 CD28 deletion. *Eur J Immunol.* 2013;43(1):188-93.
- 10 53. Golovina TN, Mikheeva T, Suhoski MM, Aqui NA, Tai VC, Shan X, et al. CD28  
11 costimulation is essential for human T regulatory expansion and function. *J Immunol.*  
12 2008;181(4):2855-68.
- 13 54. Wing JB, Tay C, and Sakaguchi S. Control of Regulatory T Cells by Co-signal  
14 Molecules. *Adv Exp Med Biol.* 2019;1189:179-210.
- 15 55. Hoeppli RE, Wu D, Cook L, and Levings MK. The environment of regulatory T cell  
16 biology: cytokines, metabolites, and the microbiome. *Front Immunol.* 2015;6:61.
- 17 56. Bour-Jordan H, and Bluestone JA. Regulating the regulators: Costimulatory signals  
18 control the homeostasis and function of regulatory T cells. *Immunological Reviews.*  
19 2009;229(1):41-66.
- 20 57. Choi BK, Bae JS, Choi EM, Kang WJ, Sakaguchi S, Vinay DS, et al. 4-1BB-dependent  
21 inhibition of immunosuppression by activated CD4+CD25+ T cells. *J Leukoc Biol.*  
22 2004;75(5):785-91.
- 23 58. Hou AJ, Chen LC, and Chen YY. Navigating CAR-T cells through the solid-tumour  
24 microenvironment. *Nat Rev Drug Discov.* 2021;20(7):531-50.
- 25 59. Capece D, Verzella D, Fischietti M, Zazzeroni F, and Alesse E. Targeting costimulatory  
26 molecules to improve antitumor immunity. *J Biomed Biotechnol.* 2012;2012:926321.
- 27 60. Zou W, and Chen L. Inhibitory B7-family molecules in the tumour microenvironment.  
28 *Nat Rev Immunol.* 2008;8(6):467-77.
- 29 61. Eshhar Z, Waks T, Gross G, and Schindler DG. Specific activation and targeting of  
30 cytotoxic lymphocytes through chimeric single chains consisting of antibody-binding  
31 domains and the gamma or zeta subunits of the immunoglobulin and T-cell receptors.  
32 *Proc Natl Acad Sci U S A.* 1993;90(2):720-4.
- 33 62. Brocker T, and Karjalainen K. Signals through T cell receptor-zeta chain alone are  
34 insufficient to prime resting T lymphocytes. *J Exp Med.* 1995;181(5):1653-9.



- 1 63. Brocker T. Chimeric Fv-zeta or Fv-epsilon receptors are not sufficient to induce  
2 activation or cytokine production in peripheral T cells. *Blood*. 2000.
- 3 64. Sterner RC, and Sterner RM. CAR-T cell therapy: current limitations and potential  
4 strategies. *Blood Cancer J*. 2021;11(4):69.
- 5 65. Zhong XS, Matsushita M, Plotkin J, Riviere I, and Sadelain M. Chimeric antigen  
6 receptors combining 4-1BB and CD28 signaling domains augment PI 3 kinase/AKT/Bcl-  
7 X L activation and CD8 T cell-mediated tumor eradication. *Molecular Therapy*.  
8 2010;18(2):413-20.
- 9 66. Friedmann-Morvinski D, Bendavid A, Waks T, Schindler D, and Eshhar Z. Redirected  
10 primary T cells harboring a chimeric receptor require costimulation for their antigen-  
11 specific activation. *Blood*. 2005;105(8):3087-93.
- 12 67. Kashem SW, Haniffa M, and Kaplan DH. Antigen-Presenting Cells in the Skin. *Annu*  
13 *Rev Immunol*. 2017;35:469-99.
- 14 68. Scheib N, Tiemann J, Becker C, Probst HC, Raker VK, and Steinbrink K. The Dendritic  
15 Cell Dilemma in the Skin: Between Tolerance and Immunity. *Front Immunol*.  
16 2022;13:929000.
- 17 69. Benichou G, Yamada Y, Yun SH, Lin C, Fray M, and Tocco G. Immune recognition and  
18 rejection of allogeneic skin grafts. *Immunotherapy*. 2011;3(6):757-70.
- 19 70. Debes GF, and McGettigan SE. Skin-Associated B Cells in Health and Inflammation. *J*  
20 *Immunol*. 2019;202(6):1659-66.
- 21 71. Morelli AE. Dendritic cells of myeloid lineage: the masterminds behind acute allograft  
22 rejection. *Curr Opin Organ Transplant*. 2014;19(1):20-7.
- 23 72. Liu Q, Rojas-Canales DM, Divito SJ, Shufesky WJ, Stolz DB, Erdos G, et al. Donor  
24 dendritic cell-derived exosomes promote allograft-targeting immune response. *J Clin*  
25 *Invest*. 2016;126(8):2805-20.
- 26 73. Prunevaille A, Babiker-Mohamed MH, Aslami C, Gonzalez-Nolasco B, Mooney N, and  
27 Benichou G. T cell antigenicity and immunogenicity of allogeneic exosomes. *Am J*  
28 *Transplant*. 2021;21(7):2583-9.
- 29 74. Zeng F, Chen Z, Chen R, Shufesky WJ, Bandyopadhyay M, Camirand G, et al. Graft-  
30 derived extracellular vesicles transported across subcapsular sinus macrophages elicit B  
31 cell alloimmunity after transplantation. *Sci Transl Med*. 2021;13(585).
- 32 75. Lee K, Nguyen V, Lee KM, Kang SM, and Tang Q. Attenuation of donor-reactive T cells  
33 allows effective control of allograft rejection using regulatory T cell therapy. *Am J*  
34 *Transplant*. 2014;14(1):27-38.

- 1 76. Tsang JY, Tanriver Y, Jiang S, Xue SA, Ratnasothy K, Chen D, et al. Conferring indirect  
2 allospecificity on CD4+CD25+ Tregs by TCR gene transfer favors transplantation  
3 tolerance in mice. *J Clin Invest*. 2008;118(11):3619-28.
- 4 77. Ratnasothy K, Jacob J, Tung S, Boardman D, Lechler RI, Sanchez-Fueyo A, et al. IL-2  
5 therapy preferentially expands adoptively transferred donor-specific Tregs improving  
6 skin allograft survival. *Am J Transplant*. 2019;19(7):2092-100.
- 7 78. Wu D, Wong MQ, Vent-Schmidt J, Boardman DA, Steiner TS, and Levings MK. A  
8 method for expansion and retroviral transduction of mouse regulatory T cells. *J Immunol*  
9 *Methods*. 2021;488:112931.
- 10 79. Cossarizza A, Chang HD, Radbruch A, Abrignani S, Addo R, Akdis M, et al. Guidelines  
11 for the use of flow cytometry and cell sorting in immunological studies (third edition).  
12 *Eur J Immunol*. 2021;51(12):2708-3145.

13

14

## FIGURES AND LEGENDS

**Figure 1**

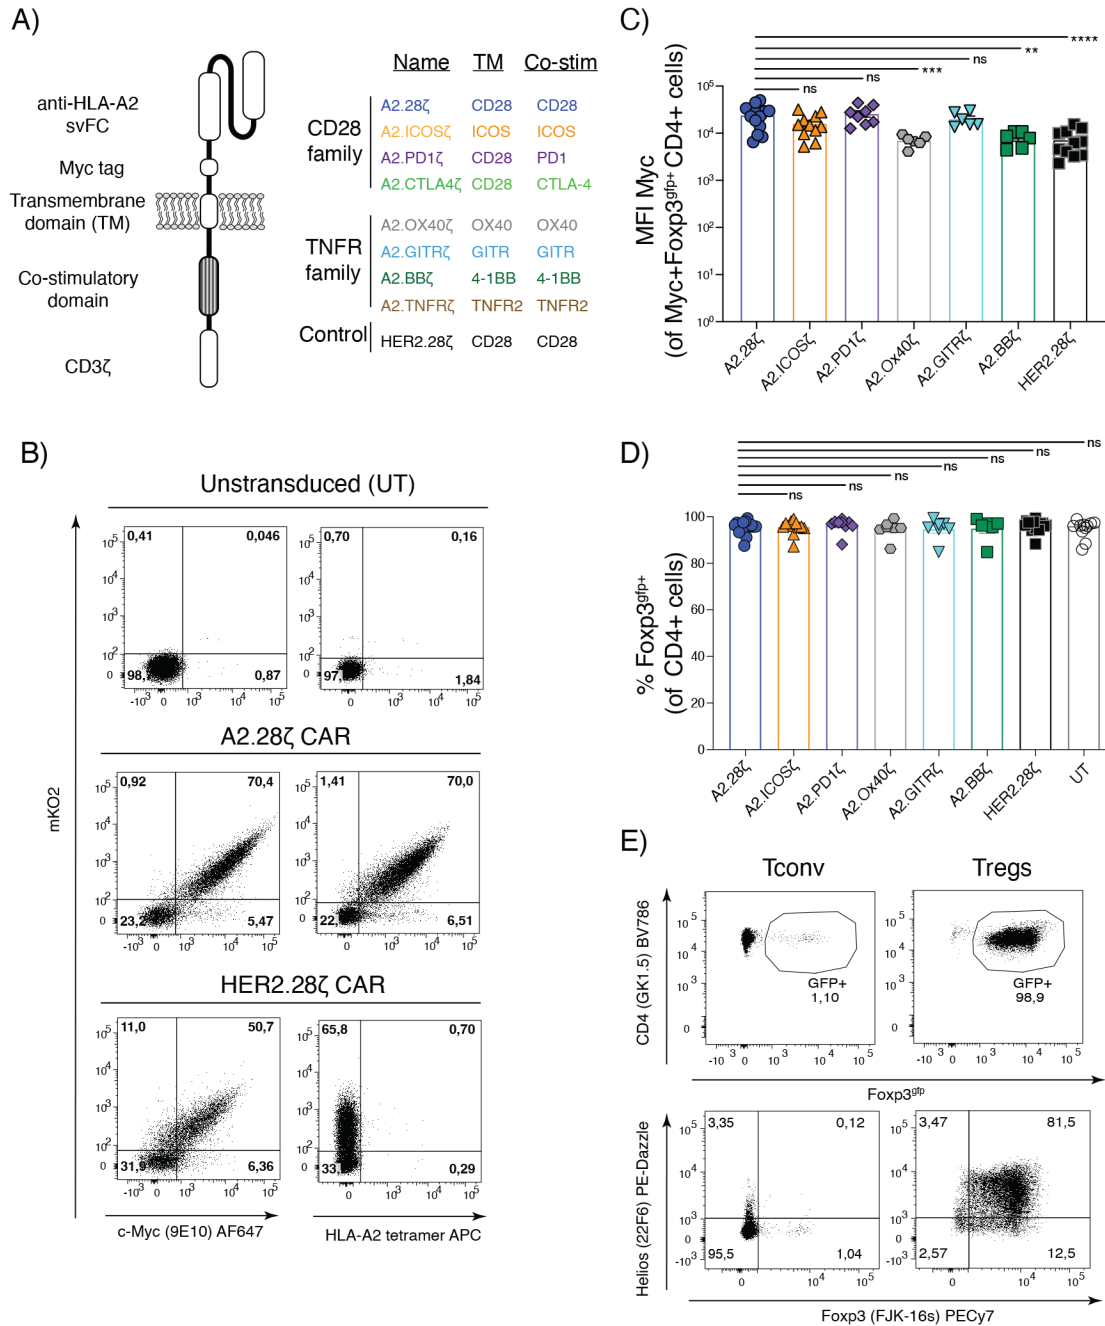

**Figure 1 | Design and expression of co-stimulatory domain CAR variants.**

(A) Schematic diagram summarizing the transmembrane and signaling domains incorporated into the second-generation CAR variants. (B) Representative flow cytometry plots showing CAR (c-Myc) and mKO2 reporter expression, and binding to an HLA-A2 tetramer. (C) MFI of CAR expression for different CAR variants in Tregs after expansion gated on live Myc<sup>+</sup>CD4<sup>+</sup>Foxp3<sup>gfp</sup> cells. (D) Foxp3<sup>gfp</sup> expression in Tregs after expansion, gated on live CD4<sup>+</sup> cells. (E) Representative data for intracellular Foxp3 and Helios expression in CAR-Tregs and

control Tconvs after expansion, gated on total live CD4<sup>+</sup> cells. Data pooled from at least 6 independent experiments and shown as mean±SEM. Statistical significance was determined using one-way ANOVA with a Holm-Sidak post-test, \*p<0.05, \*\*p<0.01, \*\*\*p<0.001, \*\*\*\*p<0.0001.

**Figure 2**

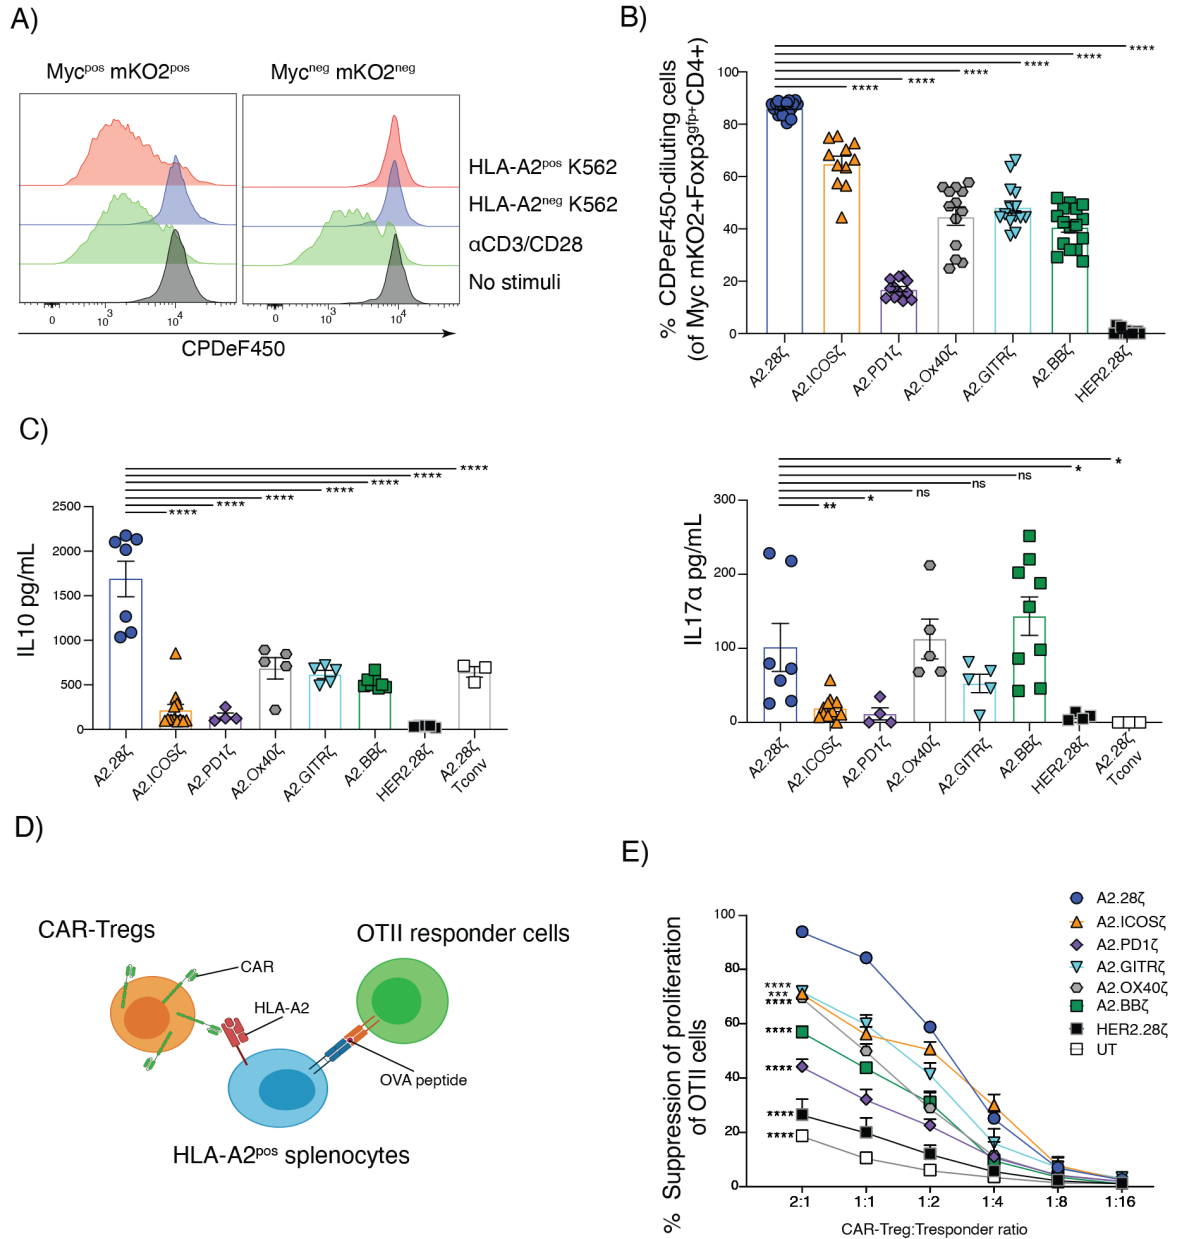

**Figure 2 | Co-stimulatory CAR variants differ in their ability to stimulate Tregs.**

(A,B&C) Tregs expressing the indicated CAR were stained with CPDeF450 and co-cultured with HLA-A2<sup>pos</sup> or HLA-A2<sup>neg</sup> K562 cells, polyclonal stimulated with anti-CD3/28, or left unstimulated for 3 days. (A) Representative histograms from A2.28 $\zeta$ -CAR Tregs comparing proliferation of gated CAR<sup>+</sup> (Myc<sup>+</sup>mKO2<sup>+</sup>) or CAR-negative (Myc<sup>-</sup>mKO2<sup>-</sup>) cells. (B) Frequencies of CAR-Tregs that divided following 3-day co-culture with HLA-A2<sup>+</sup> K562s, determined by CPDeF450 dilution, gated on cMyc<sup>+</sup>mKO2<sup>+</sup>Foxp3<sup>fp+</sup>CD4<sup>+</sup> cells. (C) Cytokine secretion following 3-days of co-culture with HLA-A2<sup>pos</sup> K562s. (D&E) CAR-Tregs were co-cultured with OTII CD4<sup>+</sup> T cells at varying ratios in the presence of irradiated HLA-A2<sup>+</sup> splenocytes and OVA peptide. (D) Schematic diagram of linked suppression assay. (E) CAR-Treg mediated suppression of the OTII CD4<sup>+</sup> T cell proliferation, as determined by Ki67

expression. UT = Untransduced. Data pooled from 5 (**B**), 3 (**C**) and 2 (**E**) independent experiments, shown as mean±SEM. Statistical significance was determined using one-way (**B/C**) or two-way (**E**) ANOVA with a Holm-Sidak post-test comparing to CD28-based CAR-Tregs, \* $p < 0.05$ , \*\* $p < 0.01$ , \*\*\* $p < 0.001$ , \*\*\*\* $p < 0.0001$ .

**Figure 3**

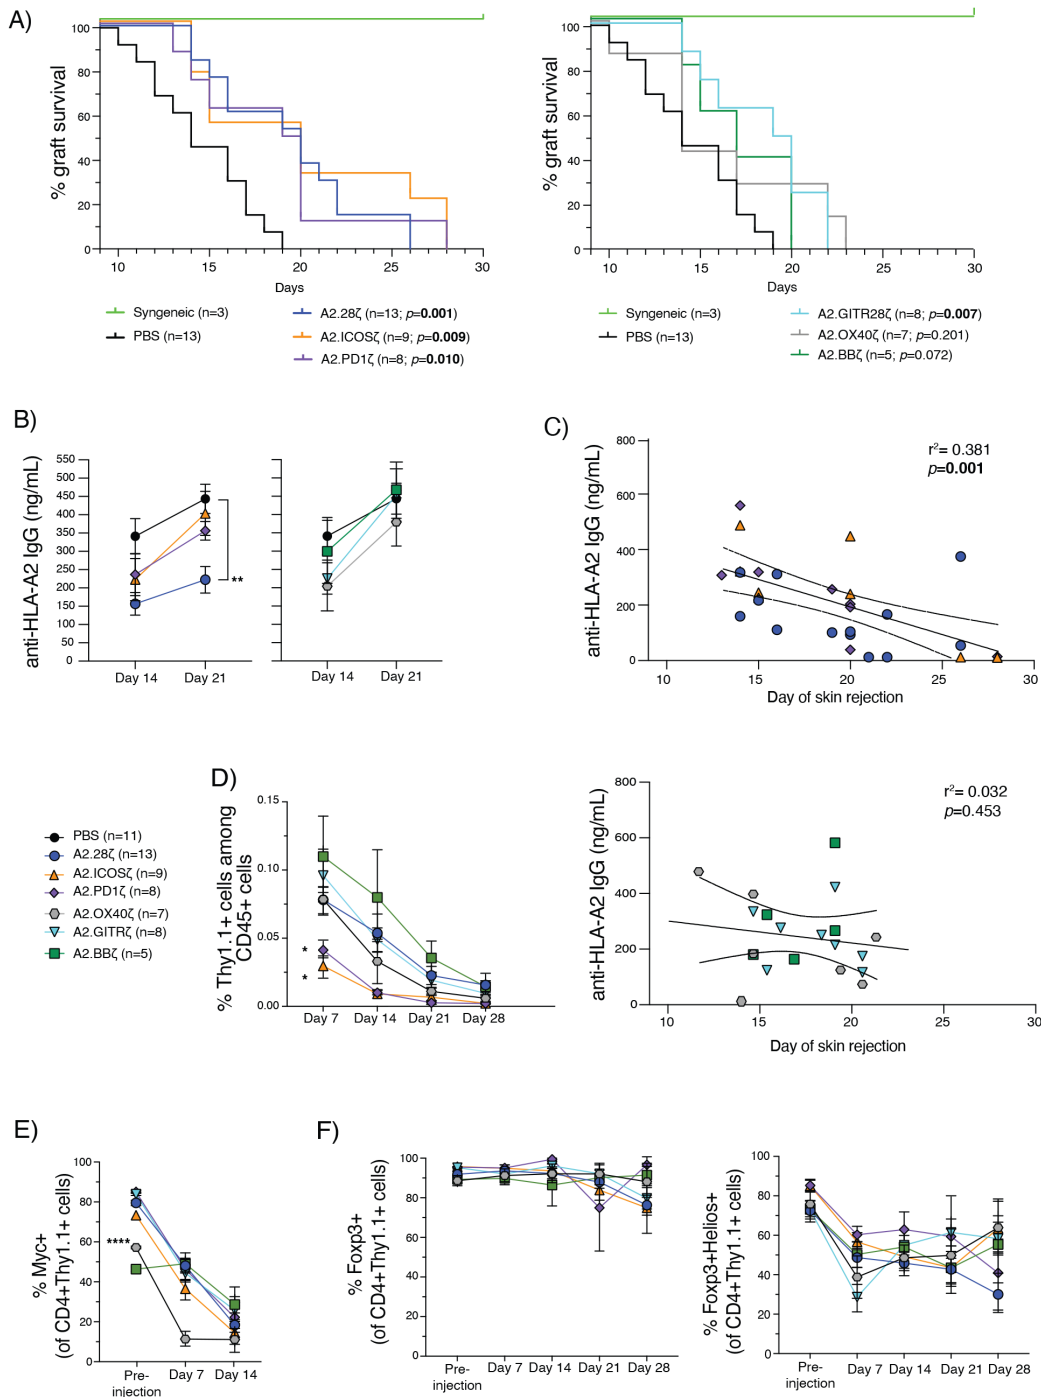

**Figure 3** | *In vivo* effects of Tregs expressing co-stimulatory CAR variants on skin rejection. BL/6 mice were transplanted with skin grafts from syngeneic or HLA-A2<sup>+</sup> BL/6 mice and intravenously administered  $1 \times 10^6$  CAR-Tregs. (A) Skin graft survival curves and (B) levels of anti-HLA-A2 IgG Abs from mice infused with Tregs expressing CARs encoding costimulatory domains from CD28 (left) or TNFR (right) family members. For A, data from mice receiving no Treg treatment (PBS) or transplanted with syngeneic wild-type BL/6 grafts are shown in both

graphs. **(C)** Correlation between anti-HLA-A2 IgG antibodies in plasma at day 14 and skin graft rejection of mice receiving Tregs bearing CD28 and TNFR family-based CARs. **(D)** % Thy1.1<sup>+</sup> CAR-Tregs of total CD45<sup>+</sup> T cells in peripheral blood over time. **(E-G)** Phenotype of Thy1.1<sup>+</sup>CD4<sup>+</sup> CAR Tregs in peripheral blood over time including expression of: **(E)** CAR (Myc<sup>+</sup>) **(F)**, FoxP3 alone (left) and FoxP3 with Helios (right). Data are mean±SEM pooled from 4-individual experiments. Statistical significance was determined using log-rank Mantel-Cox test **(A)**, two-way ANOVA **(B,D-F)** with a Holm-Sidak post-test, and Pearson correlation **(C)**. \*p<0.05, \*\*p<0.01, \*\*\*p<0.001, \*\*\*\*p<0.0001.



**Figure 4**

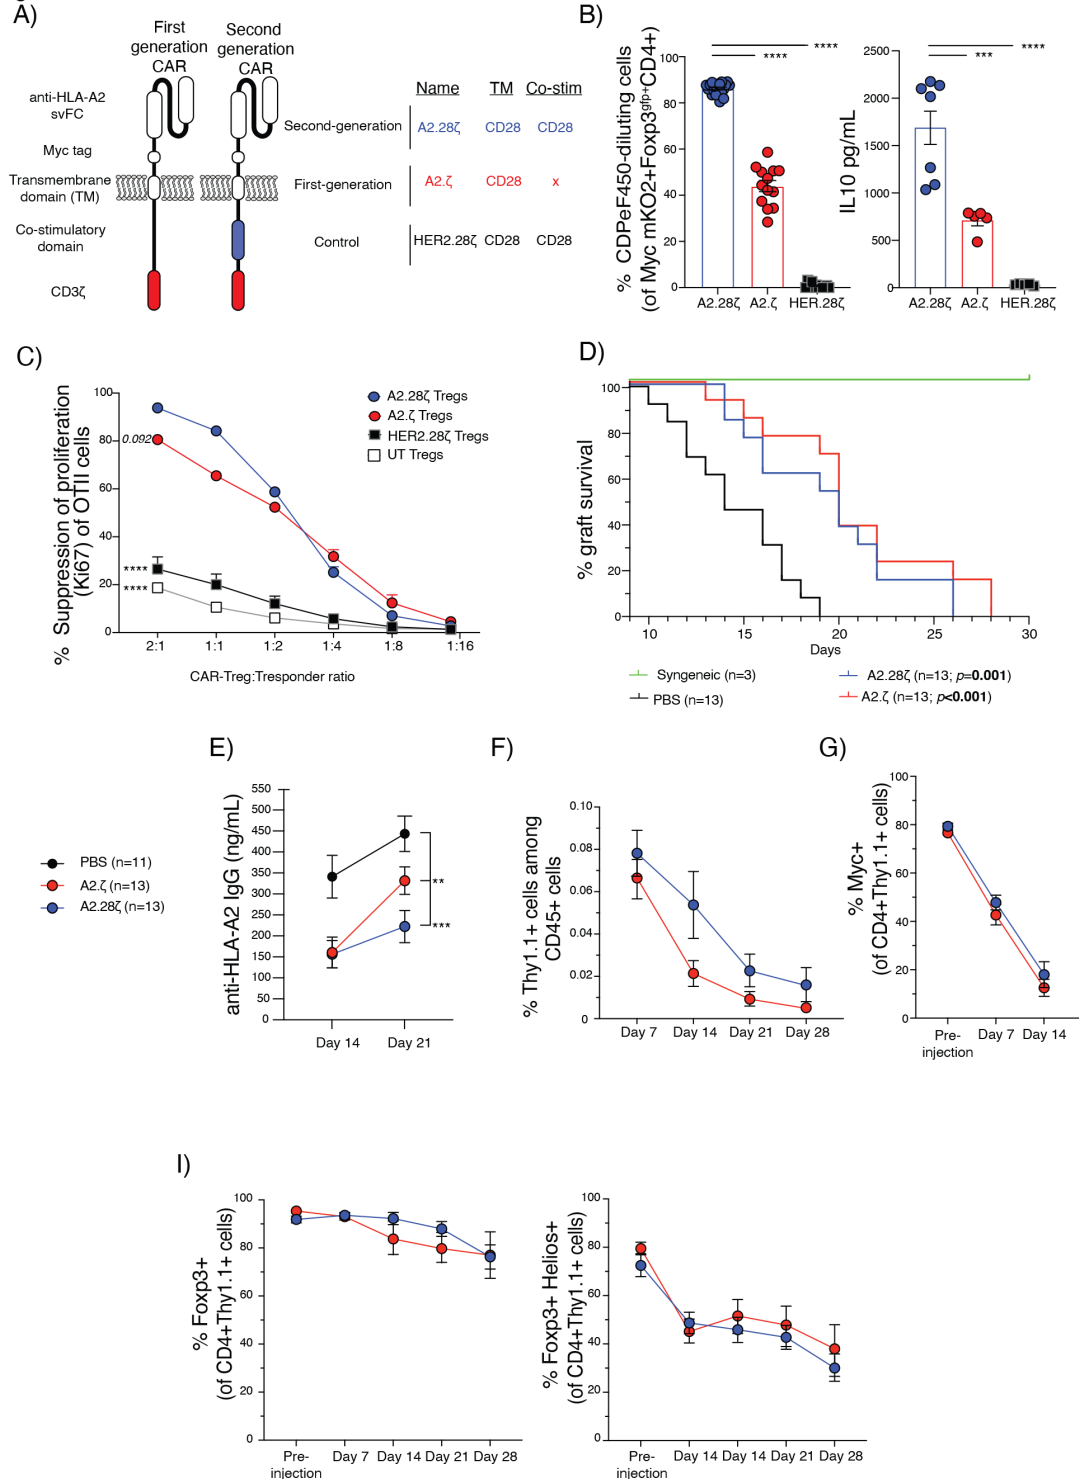

**Figure 4** | A CAR co-stimulatory domain is dispensable for CAR-Treg in vivo.

(A) Schematic diagram of the first- and second CAR used. Tregs expressing the indicated CARs were stained with CPDe450 and co-cultured with HLA-A2<sup>POS</sup> for 3 days. (B) % CAR-Tregs that divided, determined by CPDeF450 dilution (left) and IL10 secretion (right), measured in culture supernatants. (C) CAR-Tregs were co-cultured with OTII CD4<sup>+</sup> T cells at varying ratios in the

presence of irradiated HLA-A2<sup>+</sup> splenocytes and OVA peptide. CAR-Treg mediated suppression of the OTII CD4<sup>+</sup> T cell proliferation, as determined by Ki67 expression. UT = Untransduced. **(D-I)** BL/6 mice were transplanted with skin grafts from syngeneic or HLA-A2<sup>+</sup> BL/6 mice and intravenously administered 1x10<sup>6</sup> CAR-Tregs. **(D)** Skin graft survival curves and **(E)** levels of anti-HLA-A2 IgG Abs from mice infused with Tregs expressing first- and second-generation CARs. **(F)** % Thy1.1<sup>+</sup> CAR-Tregs of total CD45<sup>+</sup> T cells in peripheral blood over time. **(G-I)** Phenotype of Thy1.1<sup>+</sup>CD4<sup>+</sup> CAR Tregs in peripheral blood over time including expression of: **(G)** CAR (Myc<sup>+</sup>) **(I)**, FoxP3 and FoxP3 and Helios. Data are mean±SEM pooled from 2 **(C)**, 3 **(B, right & D-I)** or 5 **(B, left)** individual experiments. Data from the A2.28ζ, HER2.28ζ and UT conditions are also shown from Figures 1C&E and 3A,B,D, E&F. Statistical significance was determined using one-way **(B)** or two-way **(C, E-I)** ANOVA with a Holm-Sidak post-test or log-rank Mantel-Cox test **(D)**, \*p<0.05, \*\*p<0.01, \*\*\*p<0.001. \*\*\*\*p<0.0001.

**Figure 5**

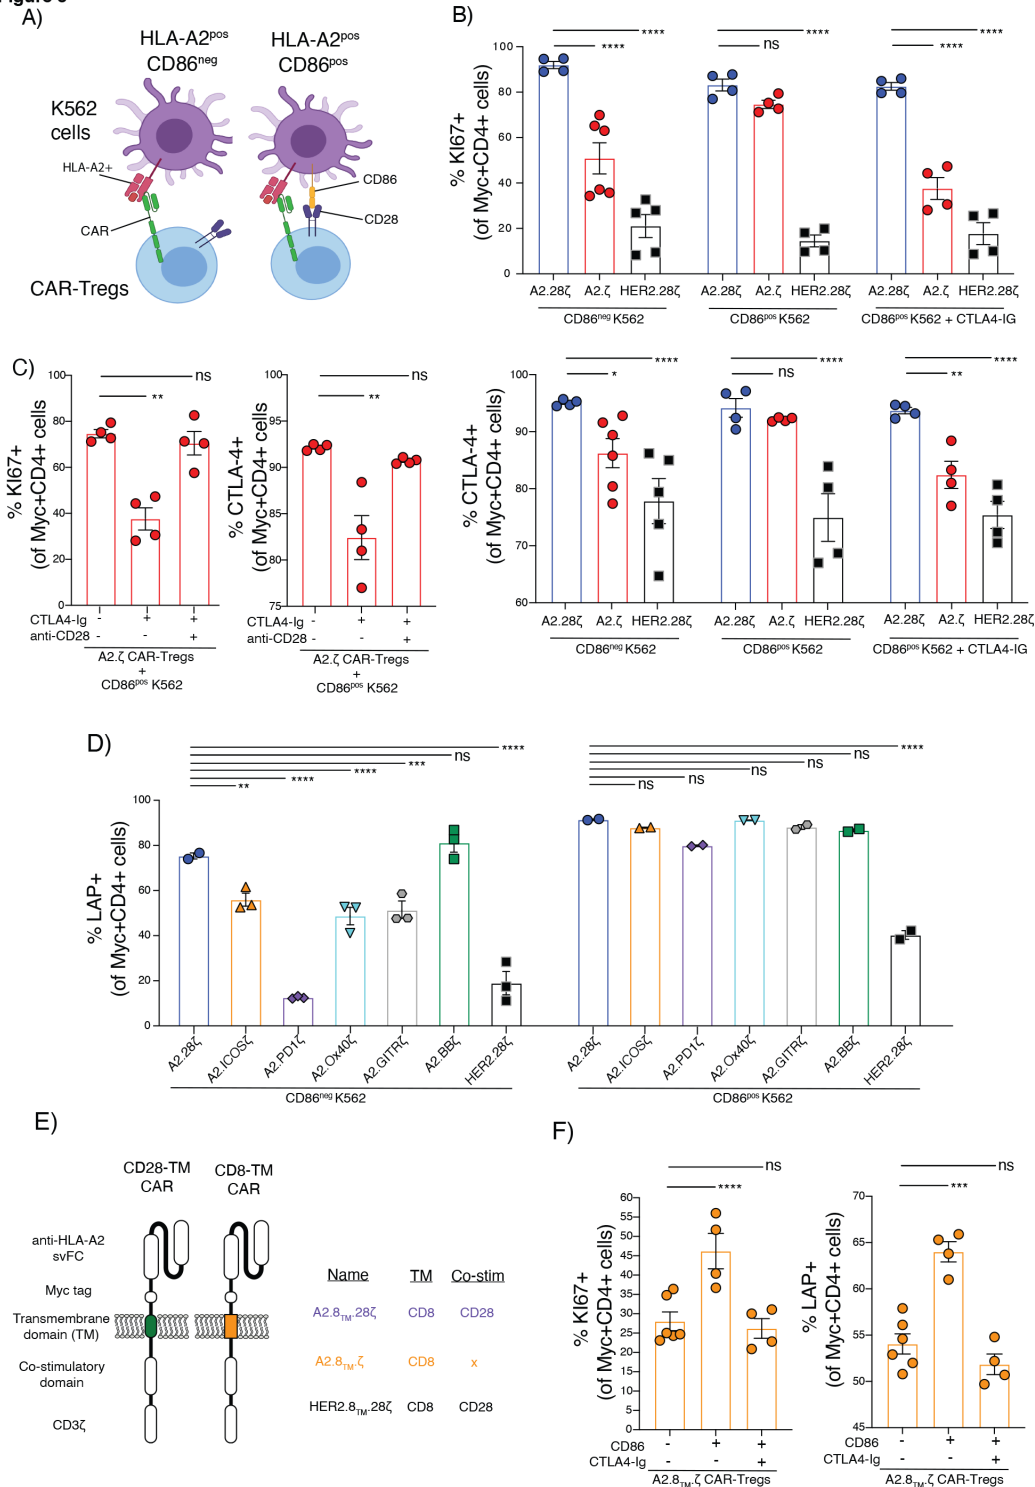

**Figure 5 | Effect of exogenous co-stimulation on CAR-Tregs.**

CAR-Tregs were co-cultured with CD86<sup>pos</sup>HLA-A2<sup>pos</sup> or CD86<sup>neg</sup>HLA-A2<sup>pos</sup> K562 cells at a 1:2 K562:Tregs ratio for 3 days. **(A)** Schematic diagram of assay. **(B-C)** Ki67 and CTLA4 expression in CAR-Tregs following 3-days of co-culture, gated on Myc+CD4+ live cells. **(D)**

LAP expression in different co-stimulatory-encoding CAR-Tregs following 3-days of co-culture, gated on Myc+CD4+ live cells. (E) Schematic diagram of the CD8 $\alpha$ -transmembrane domain (TM) CARs generated. (F) Ki67 and LAP expression in first-generation CD8 $\alpha$ -TM CAR-Tregs following 3-days of co-culture, gated on Myc+CD4+ live cells. Where indicated, CTLA4-Ig and an anti-CD28 agonist mAb were added at 10  $\mu$ g/mL. Data are mean $\pm$ SEM pooled from 2 (B,C) and 1 (D,F) independent experiments. Statistical significance was determined using one-way (C/F) or two-way (B,D) ANOVA with a Holm-Sidak post-test, \* $p$ <0.05, \*\* $p$ <0.01, \*\*\* $p$ <0.001, \*\*\*\* $p$ <0.0001.

**Figure 6**

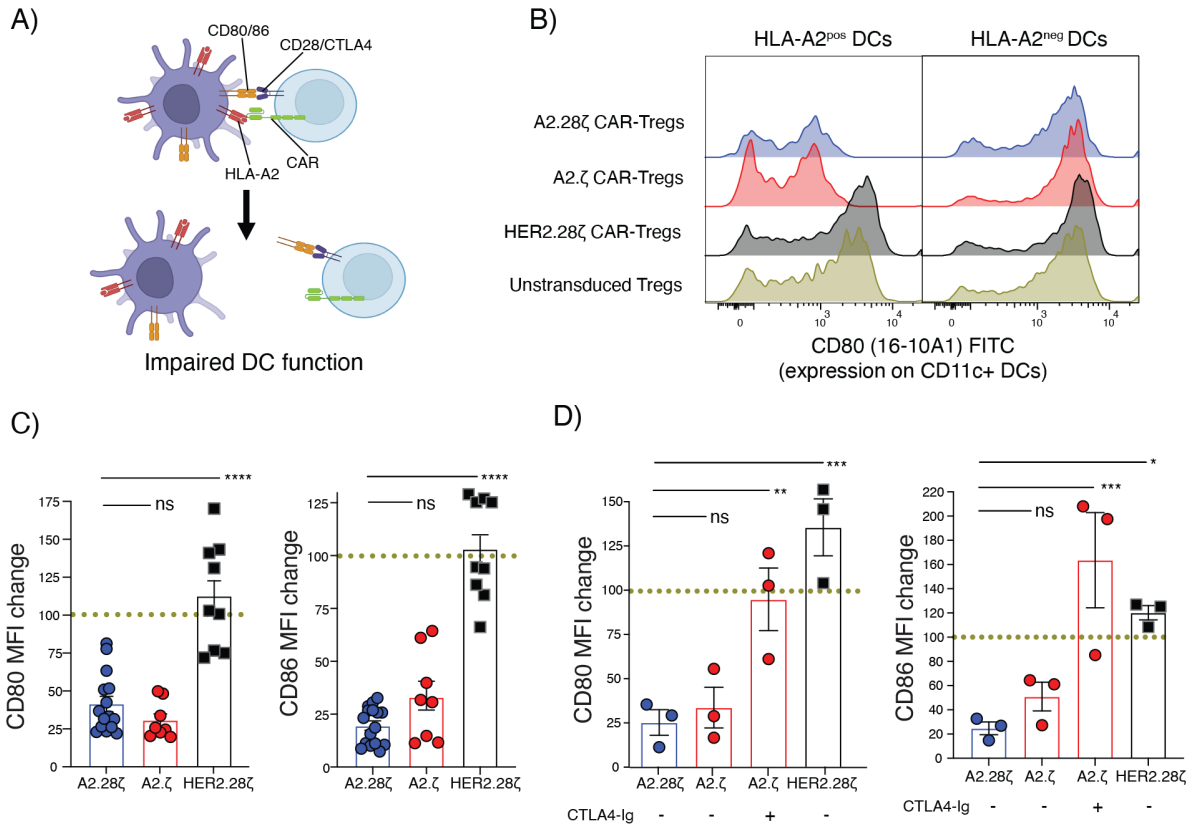

**Figure 6** | *APC suppression by first- and second-generation CAR-Tregs.*

CAR-Tregs were co-cultured with splenic HLA-A2<sup>+</sup> CD11c<sup>+</sup> DCs at a 1:2 or 1:5 DCs:Tregs for 1 or 2 days. **(A)** Schematic of DC suppression assay. **(B)** Representative histograms showing CD80 expression on CD11c<sup>+</sup> DCs after 2-days of cultured with the indicated types of Tregs. **(C)** Expression of CD80 (left) and CD86 (right) in HLA-A2<sup>+</sup> CD11c<sup>+</sup> DCs, relative to DCs cultured with untransduced Tregs (dotted line). **(D)** DCs suppression assays performed with or without 10  $\mu$ g/mL CTLA4-Ig. For C&D, data are shown relative to DCs cultured with untransduced Tregs which were normalized to 100% (dotted lines). Data shown as mean $\pm$ SEM and pooled from 5 **(C)** and 2 **(D)** independent experiments. Statistical significance was determined using one-way ANOVA with a Holm-Sidak post-test, \*p<0.05, \*\*p<0.01, \*\*\*p<0.001, \*\*\*\*p<0.0001.
